# Supplementary material for: The Use of Soy and Egg Phosphatidylcholines Modified with Caffeic Acid Enhances the Oxidative Stability of High-Fat (70%) Fish Oil-in-Water Emulsions
Source: MDPI journal article supplement (doi:10.3390/colloids7030060), 2023-09-18
Supplement: s1 [file s1]

## Supplementary material

# The Use of Soy and Egg Phosphatidylcholines Modified with Caffeic Acid Enhances the Oxidative Stability of High-Fat (70%) Fish Oil-in-Water Emulsions

Betül Yesiltas <sup>1,\*</sup>, Pedro J. García-Moreno <sup>2</sup>, Ann-Dorit M. Sørensen <sup>1</sup>, Chiranjib Banerjee <sup>3</sup>, Sampson Anankanbil <sup>4</sup>, Zheng Guo <sup>4</sup>, Peter R. Ogilby <sup>3</sup> and Charlotte Jacobsen <sup>1,\*</sup>

Table S1. Development of the creaming index during storage

| Sample codes | Creaming Index (%) |       |       |       |        |
|--------------|--------------------|-------|-------|-------|--------|
|              | Day 1              | Day 2 | Day 5 | Day 8 | Day 12 |
| 1-CAS        | 0.0                | 0.0   | 0.0   | 0.0   | 0.0    |
| 2-CPC        | 0.0                | 0.0   | 0.0   | 1.0   | 2.0    |
| 3-SPC_L      | 0.0                | 0.0   | 0.0   | 2.0   | 2.0    |
| 4-SPC_M      | 0.0                | 1.0   | 2.0   | 4.0   | 5.0    |
| 5-SPC_H      | 1.0                | 1.0   | 3.0   | 6.0   | 7.0    |
| 6-EPC_L      | 0.0                | 0.0   | 0.0   | 1.0   | 2.0    |
| 7-EPC_M      | 0.0                | 0.0   | 1.0   | 2.0   | 3.0    |
| 8-EPC_H      | 0.0                | 1.0   | 2.0   | 3.0   | 4.0    |
| 9-CPC_L      | 2.0                | 4.0   | 6.0   | 7.0   | 6.0    |
| 10-CPC_H     | 6.0                | 10.0  | 12.0  | 14.0  | 14.0   |

Table S2. Statistical analysis for a) peroxide value, b)  $\alpha$ -tocopherol, c) 1-penten-3-ol, d) 2-pentenal, e) (*E,E*)-2,4-heptadienal, and f) hexanal

| (a) PV                   | Day 0                   | Day 2                   | Day 5                    | Day 8                   | Day 12                      |
|--------------------------|-------------------------|-------------------------|--------------------------|-------------------------|-----------------------------|
| 1-CAS                    | 0.14±0.00 <sup>a</sup>  | 0.26±0.02 <sup>a</sup>  | 1.50±0.00 <sup>b</sup>   | 4.22±0.26 <sup>c</sup>  | 5.41±0.08 <sup>d,H</sup>    |
| 2-CPC                    | 0.16±0.03 <sup>a</sup>  | 0.46±0.00 <sup>b</sup>  | 1.64±0.00 <sup>c</sup>   | 3.24±0.09 <sup>d</sup>  | 4.89±0.10 <sup>e,G</sup>    |
| 3-SPC_L                  | 0.16±0.03 <sup>a</sup>  | 0.92±0.00 <sup>b</sup>  | 2.69±0.02 <sup>c</sup>   | 3.96±0.14 <sup>d</sup>  | 5.36±0.01 <sup>e,H</sup>    |
| 4-SPC_M                  | 0.13±0.01 <sup>a</sup>  | 0.54±0.01 <sup>b</sup>  | 1.27±0.01 <sup>c</sup>   | 2.27±0.00 <sup>d</sup>  | 2.90±0.02 <sup>e,E</sup>    |
| 5-SPC_H                  | 0.12±0.01 <sup>a</sup>  | 0.27±0.00 <sup>b</sup>  | 0.67±0.00 <sup>c</sup>   | 1.23±0.06 <sup>d</sup>  | 1.69±0.03 <sup>e,A</sup>    |
| 6-EPC_L                  | 0.15±0.00 <sup>a</sup>  | 0.73±0.00 <sup>b</sup>  | 2.32±0.02 <sup>c</sup>   | 3.59±0.03 <sup>d</sup>  | 4.52±0.06 <sup>e,F</sup>    |
| 7-EPC_M                  | 0.18±0.02 <sup>a</sup>  | 0.48±0.01 <sup>b</sup>  | 1.20±0.00 <sup>c</sup>   | 1.99±0.04 <sup>d</sup>  | 2.62±0.08 <sup>e,D</sup>    |
| 8-EPC_H                  | 0.13±0.00 <sup>a</sup>  | 0.34±0.01 <sup>b</sup>  | 0.93±0.03 <sup>c</sup>   | 1.42±0.00 <sup>d</sup>  | 1.92±0.07 <sup>e,B</sup>    |
| 9-CPC_L                  | 0.17±0.01 <sup>a</sup>  | 0.50±0.02 <sup>b</sup>  | 1.22±0.02 <sup>c</sup>   | 1.74±0.06 <sup>d</sup>  | 2.26±0.03 <sup>e,C</sup>    |
| 10-CPC_H                 | 0.19±0.02 <sup>a</sup>  | 0.38±0.01 <sup>b</sup>  | 0.85±0.00 <sup>c</sup>   | 1.21±0.00 <sup>d</sup>  | 1.68±0.03 <sup>e,A</sup>    |
| (b) $\alpha$ -tocopherol | Day 0                   | Day 2                   | Day 5                    | Day 8                   | Day 12                      |
| 1-CAS                    | 164.1±1.29 <sup>b</sup> | 164.5±5.86 <sup>b</sup> | 163.5±1.16 <sup>ab</sup> | 158.6±0.97 <sup>a</sup> | 160.3±2.15 <sup>ab,AB</sup> |

|                            |                           |                           |                            |                           |                              |
|----------------------------|---------------------------|---------------------------|----------------------------|---------------------------|------------------------------|
| 2-CPC                      | 190.5±1.59 <sup>b</sup>   | 193.4±0.56 <sup>bc</sup>  | 194.8±3.82 <sup>c</sup>    | 184.0±1.99 <sup>a</sup>   | 191.8±0.50 <sup>bc,F</sup>   |
| 3-SPC_L                    | 186.0±0.11 <sup>a</sup>   | 186.0±0.54 <sup>a</sup>   | 190.5±3.71 <sup>a</sup>    | 186.3±0.63 <sup>a</sup>   | 183.3±8.95 <sup>a,DE</sup>   |
| 4-SPC_M                    | 181.2±0.98 <sup>b</sup>   | 181.6±6.57 <sup>b</sup>   | 180.3±1.61 <sup>b</sup>    | 175.7±2.87 <sup>b</sup>   | 164.7±0.58 <sup>a,AB</sup>   |
| 5-SPC_H                    | 173.6±0.00 <sup>bc</sup>  | 171.9±1.60 <sup>b</sup>   | 172.3±1.70 <sup>bc</sup>   | 174.1±0.17 <sup>c</sup>   | 164.3±0.65 <sup>a,B</sup>    |
| 6-EPC_L                    | 188.5±2.54 <sup>a</sup>   | 186.1±1.72 <sup>a</sup>   | 188.3±7.28 <sup>a</sup>    | 190.3±0.22 <sup>a</sup>   | 187.8±0.39 <sup>a,EF</sup>   |
| 7-EPC_M                    | 183.5±4.09 <sup>b</sup>   | 183.3±0.56 <sup>b</sup>   | 186.6±8.43 <sup>b</sup>    | 186.9±5.07 <sup>b</sup>   | 171.5±0.31 <sup>a,C</sup>    |
| 8-EPC_H                    | 184.3±4.64 <sup>d</sup>   | 167.8±1.26 <sup>b</sup>   | 169.5±4.53 <sup>b</sup>    | 176.3±1.29 <sup>c</sup>   | 159.5±0.80 <sup>a,A</sup>    |
| 9-CPC_L                    | 197.1±2.38 <sup>d</sup>   | 190.7±0.99 <sup>c</sup>   | 186.1±0.31 <sup>b</sup>    | 191.8±1.42 <sup>c</sup>   | 180.5±1.76 <sup>a,D</sup>    |
| 10-CPC_H                   | 198.6±1.07 <sup>d</sup>   | 190.7±2.56 <sup>b</sup>   | 195.2±2.82 <sup>cd</sup>   | 192.6±1.39 <sup>bc</sup>  | 179.9±0.92 <sup>a,D</sup>    |
| <b>(c) 1-Penten-3-ol</b>   | <b>Day 0</b>              | <b>Day 2</b>              | <b>Day 5</b>               | <b>Day 8</b>              | <b>Day 12</b>                |
| 1-CAS                      | 40.99±2.99 <sup>a</sup>   | 30.82±9.14 <sup>a</sup>   | 121.04±13.32 <sup>b</sup>  | 311.39±32.91 <sup>c</sup> | 383.88±7.02 <sup>d,E</sup>   |
| 2-CPC                      | 29.45±4.04 <sup>a</sup>   | 54.74±7.13 <sup>a</sup>   | 117.33±14.38 <sup>b</sup>  | 295.08±20.80 <sup>c</sup> | 348.72±38.59 <sup>d,E</sup>  |
| 3-SPC_L                    | 3.92±3.21 <sup>a</sup>    | 30.38±3.48 <sup>b</sup>   | 98.09±6.31 <sup>c</sup>    | 181.23±14.38 <sup>d</sup> | 179.91±25.29 <sup>d,C</sup>  |
| 4-SPC_M                    | 0.00±0.00 <sup>a</sup>    | 7.77±4.46 <sup>b</sup>    | 23.89±3.89 <sup>c</sup>    | 50.65±3.14 <sup>d</sup>   | 78.07±6.11 <sup>e,B</sup>    |
| 5-SPC_H                    | 0.00±0.00 <sup>a</sup>    | 0.00±0.00 <sup>a</sup>    | 0.00±0.00 <sup>a</sup>     | 0.35±0.33 <sup>a</sup>    | 1.72±1.49 <sup>b,A</sup>     |
| 6-EPC_L                    | 0.09±0.13 <sup>a</sup>    | 29.82±2.16 <sup>b</sup>   | 97.74±3.44 <sup>c</sup>    | 150.71±22.31 <sup>d</sup> | 192.22±25.71 <sup>e,C</sup>  |
| 7-EPC_M                    | 0.00±0.00 <sup>a</sup>    | 12.87±2.15 <sup>ab</sup>  | 27.86±11.23 <sup>b</sup>   | 82.79±27.90 <sup>c</sup>  | 95.53±9.89 <sup>c,B</sup>    |
| 8-EPC_H                    | 0.00±0.00 <sup>a</sup>    | 0.00±0.00 <sup>a</sup>    | 5.30±0.40 <sup>b</sup>     | 10.54±1.01 <sup>c</sup>   | 14.96±2.72 <sup>d,A</sup>    |
| 9-CPC_L                    | 6.94±1.71 <sup>a</sup>    | 35.10±1.65 <sup>a</sup>   | 118.86±8.12 <sup>b</sup>   | 172.82±18.54 <sup>c</sup> | 255.42±42.63 <sup>d,D</sup>  |
| 10-CPC_H                   | 7.97±0.99 <sup>a</sup>    | 25.88±2.28 <sup>b</sup>   | 54.55±11.09 <sup>c</sup>   | 85.77±9.88 <sup>d</sup>   | 62.75±8.59 <sup>c,B</sup>    |
| <b>(d) 2-Pentenal</b>      | <b>Day 0</b>              | <b>Day 2</b>              | <b>Day 5</b>               | <b>Day 8</b>              | <b>Day 12</b>                |
| 1-CAS                      | 31.28±3.99 <sup>b</sup>   | 16.27±0.95 <sup>a</sup>   | 36.78±2.54 <sup>b</sup>    | 64.92±9.93 <sup>c</sup>   | 65.58±2.44 <sup>c,CD</sup>   |
| 2-CPC                      | 20.86±3.95 <sup>a</sup>   | 24.30±3.42 <sup>a</sup>   | 33.92±1.75 <sup>b</sup>    | 61.46±3.62 <sup>c</sup>   | 63.76±6.40 <sup>c,CD</sup>   |
| 3-SPC_L                    | 24.17±2.35 <sup>a</sup>   | 43.10±1.40 <sup>a</sup>   | 110.67±8.05 <sup>b</sup>   | 153.14±23.37 <sup>b</sup> | 126.12±10.17 <sup>c,F</sup>  |
| 4-SPC_M                    | 16.27±4.01 <sup>a</sup>   | 32.02±7.32 <sup>a</sup>   | 44.69±3.50 <sup>b</sup>    | 68.45±3.56 <sup>c</sup>   | 82.99±0.74 <sup>d,DE</sup>   |
| 5-SPC_H                    | 9.92±3.96 <sup>a</sup>    | 10.88±2.58 <sup>a</sup>   | 10.17±3.46 <sup>a</sup>    | 18.29±3.21 <sup>b</sup>   | 21.57±0.61 <sup>b,A</sup>    |
| 6-EPC_L                    | 11.93±1.80 <sup>a</sup>   | 39.38±1.97 <sup>b</sup>   | 94.97±1.69 <sup>c</sup>    | 118.23±20.23 <sup>d</sup> | 137.78±11.42 <sup>e,F</sup>  |
| 7-EPC_M                    | 8.91±1.45 <sup>a</sup>    | 34.37±2.01 <sup>b</sup>   | 45.71±9.07 <sup>b</sup>    | 73.19±6.75 <sup>c</sup>   | 86.91±10.59 <sup>d,E</sup>   |
| 8-EPC_H                    | 8.53±5.16 <sup>a</sup>    | 14.97±2.37 <sup>ab</sup>  | 25.57±2.70 <sup>c</sup>    | 20.81±6.31 <sup>bc</sup>  | 29.45±7.89 <sup>c,AB</sup>   |
| 9-CPC_L                    | 7.86±0.68 <sup>a</sup>    | 23.93±0.24 <sup>a</sup>   | 54.97±3.86 <sup>b</sup>    | 61.92±1.78 <sup>b</sup>   | 66.50±32.96 <sup>b,CDE</sup> |
| 10-CPC_H                   | 12.35±0.46 <sup>a</sup>   | 29.92±1.73 <sup>b</sup>   | 53.35±6.88 <sup>c</sup>    | 65.09±5.05 <sup>d</sup>   | 50.61±1.31 <sup>c,BC</sup>   |
| <b>(e) 2,4-Heptadienal</b> | <b>Day 0</b>              | <b>Day 2</b>              | <b>Day 5</b>               | <b>Day 8</b>              | <b>Day 12</b>                |
| 1-CAS                      | 63.77±28.92 <sup>ab</sup> | 40.39±7.66 <sup>a</sup>   | 86.70±7.96 <sup>b</sup>    | 182.20±16.44 <sup>c</sup> | 237.02±23.88 <sup>d,D</sup>  |
| 2-CPC                      | 31.43±10.49 <sup>a</sup>  | 48.06±13.40 <sup>ab</sup> | 86.12±21.67 <sup>b</sup>   | 150.35±23.51 <sup>c</sup> | 206.36±32.84 <sup>d,D</sup>  |
| 3-SPC_L                    | 34.82±4.68 <sup>a</sup>   | 55.01±3.37 <sup>a</sup>   | 214.53±14.62 <sup>b</sup>  | 524.28±62.29 <sup>c</sup> | 545.62±83.75 <sup>c,E</sup>  |
| 4-SPC_M                    | 27.39±4.53 <sup>a</sup>   | 33.56±9.83 <sup>a</sup>   | 58.85±6.85 <sup>b</sup>    | 87.05±8.33 <sup>c</sup>   | 105.98±9.81 <sup>d,BC</sup>  |
| 5-SPC_H                    | 15.17±1.73 <sup>a</sup>   | 27.16±6.42 <sup>ab</sup>  | 32.85±19.98 <sup>abc</sup> | 38.94±6.88 <sup>bc</sup>  | 46.77±6.53 <sup>c,AB</sup>   |
| 6-EPC_L                    | 22.06±3.22 <sup>a</sup>   | 41.88±7.07 <sup>a</sup>   | 155.68±5.40 <sup>b</sup>   | 367.89±67.79 <sup>c</sup> | 529.64±39.72 <sup>d,E</sup>  |
| 7-EPC_M                    | 20.15±1.97 <sup>a</sup>   | 33.13±4.24 <sup>a</sup>   | 54.09±6.51 <sup>b</sup>    | 83.41±17.75 <sup>c</sup>  | 124.25±14.61 <sup>d,C</sup>  |
| 8-EPC_H                    | 15.28±11.01 <sup>a</sup>  | 17.16±2.38 <sup>a</sup>   | 29.54±2.73 <sup>ab</sup>   | 27.33±17.05 <sup>ab</sup> | 43.69±11.33 <sup>b,A</sup>   |
| 9-CPC_L                    | 15.16±1.92 <sup>a</sup>   | 30.51±4.83 <sup>ab</sup>  | 71.26±2.86 <sup>bc</sup>   | 98.21±29.88 <sup>c</sup>  | 141.88±40.67 <sup>d,C</sup>  |
| 10-CPC_H                   | 19.05±2.39 <sup>a</sup>   | 29.86±5.68 <sup>b</sup>   | 47.74±1.78 <sup>c</sup>    | 61.76±3.67 <sup>cd</sup>  | 54.72±6.98 <sup>d,AB</sup>   |
| <b>(f) Hexanal</b>         | <b>Day 0</b>              | <b>Day 2</b>              | <b>Day 5</b>               | <b>Day 8</b>              | <b>Day 12</b>                |

|          |                           |                           |                            |                           |                              |
|----------|---------------------------|---------------------------|----------------------------|---------------------------|------------------------------|
| 1-CAS    | 24.67±1.80 <sup>b</sup>   | 13.09±3.46 <sup>a</sup>   | 29.00±6.25 <sup>b</sup>    | 40.93±2.17 <sup>b</sup>   | 28.12±1.83 <sup>b,A</sup>    |
| 2-CPC    | 30.15±4.92 <sup>a</sup>   | 39.42±10.98 <sup>a</sup>  | 33.42±1.41 <sup>a</sup>    | 38.41±7.42 <sup>a</sup>   | 33.25±6.58 <sup>a,A</sup>    |
| 3-SPC_L  | 40.83±2.39 <sup>a</sup>   | 44.60±1.67 <sup>a</sup>   | 51.39±7.71 <sup>ab</sup>   | 72.42±12.26 <sup>bc</sup> | 64.56±7.52 <sup>bc,BC</sup>  |
| 4-SPC_M  | 39.93±11.46 <sup>a</sup>  | 46.22±11.77 <sup>a</sup>  | 35.39±4.39 <sup>a</sup>    | 39.72±2.96 <sup>a</sup>   | 49.18±3.25 <sup>a,AB</sup>   |
| 5-SPC_H  | 37.60±12.51 <sup>a</sup>  | 53.15±11.53 <sup>b</sup>  | 39.29±4.83 <sup>ab</sup>   | 36.28±3.65 <sup>ab</sup>  | 47.16±0.29 <sup>ab,AB</sup>  |
| 6-EPC_L  | 55.38±6.34 <sup>a</sup>   | 88.35±4.88 <sup>b</sup>   | 75.36±1.90 <sup>b</sup>    | 76.04±12.11 <sup>b</sup>  | 85.76±16.71 <sup>b,C</sup>   |
| 7-EPC_M  | 102.35±10.44 <sup>a</sup> | 155.90±5.20 <sup>c</sup>  | 116.78±23.94 <sup>ab</sup> | 136.87±8.50 <sup>ab</sup> | 123.08±15.64 <sup>ab,D</sup> |
| 8-EPC_H  | 225.93±81.44 <sup>a</sup> | 154.24±28.25 <sup>a</sup> | 181.91±8.88 <sup>a</sup>   | 183.80±9.06 <sup>a</sup>  | 160.81±41.19 <sup>a,E</sup>  |
| 9-CPC_L  | 11.69±0.65 <sup>a</sup>   | 29.58±1.34 <sup>b</sup>   | 51.15±2.85 <sup>c</sup>    | 49.21±1.89 <sup>c</sup>   | 50.64±9.26 <sup>c,AB</sup>   |
| 10-CPC_H | 31.41±1.76 <sup>a</sup>   | 41.61±3.21 <sup>a</sup>   | 78.67±6.55 <sup>b</sup>    | 93.29±2.85 <sup>bc</sup>  | 88.57±11.35 <sup>bc,C</sup>  |

Small letters denote significant differences between sampling points for the same sample and capital letters denote significant differences between samples at the last sampling point ( $p < 0.05$ ).

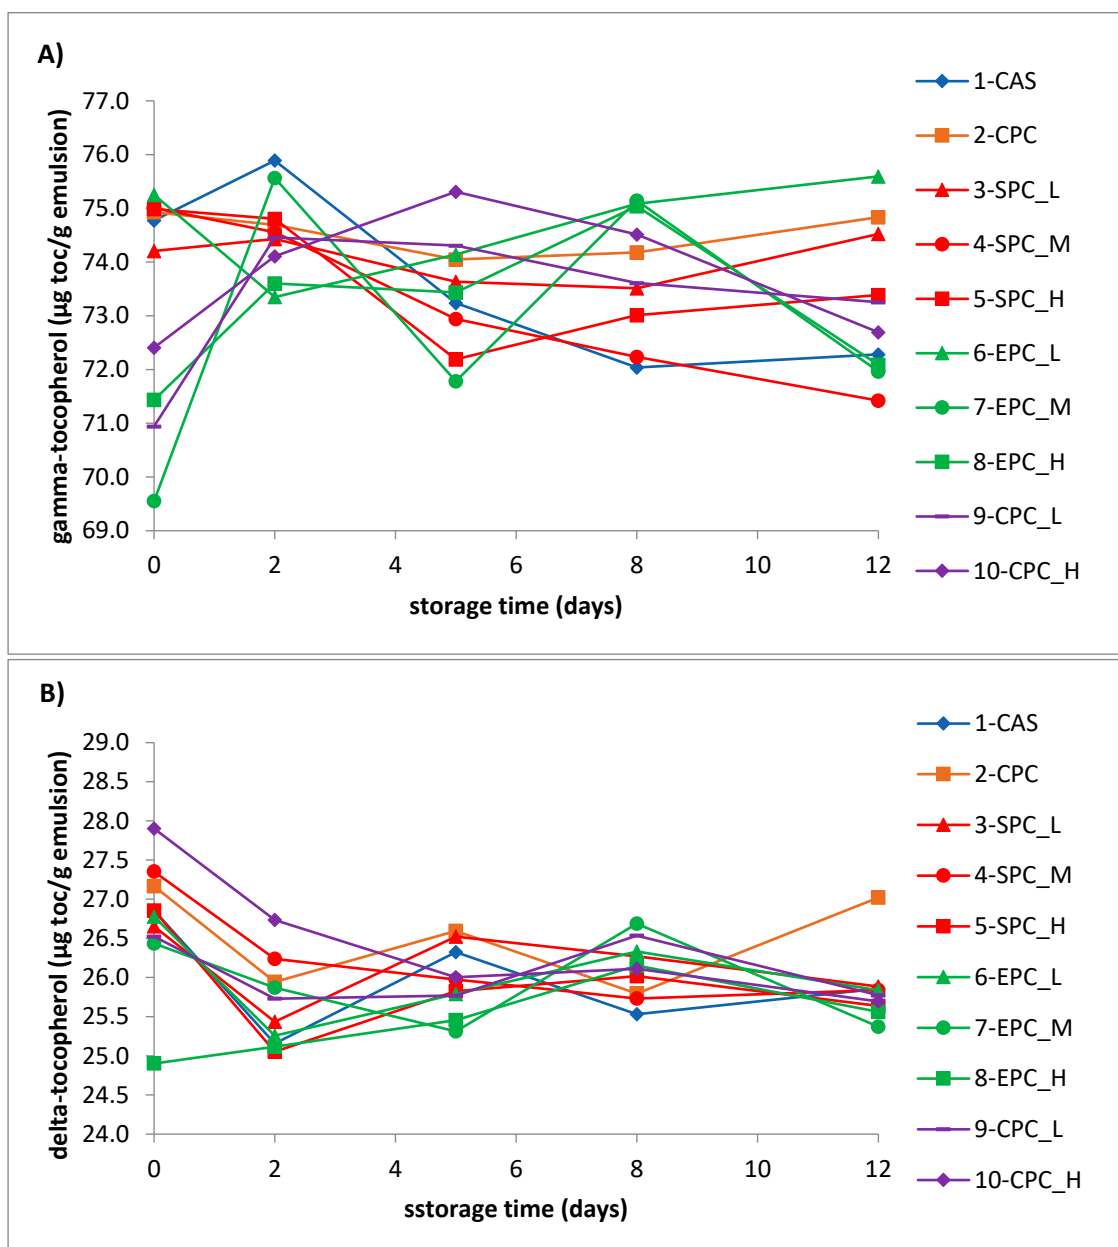

Figure S1. (A) Gamma- and (B) delta-tocopherol consumption during 12-day storage

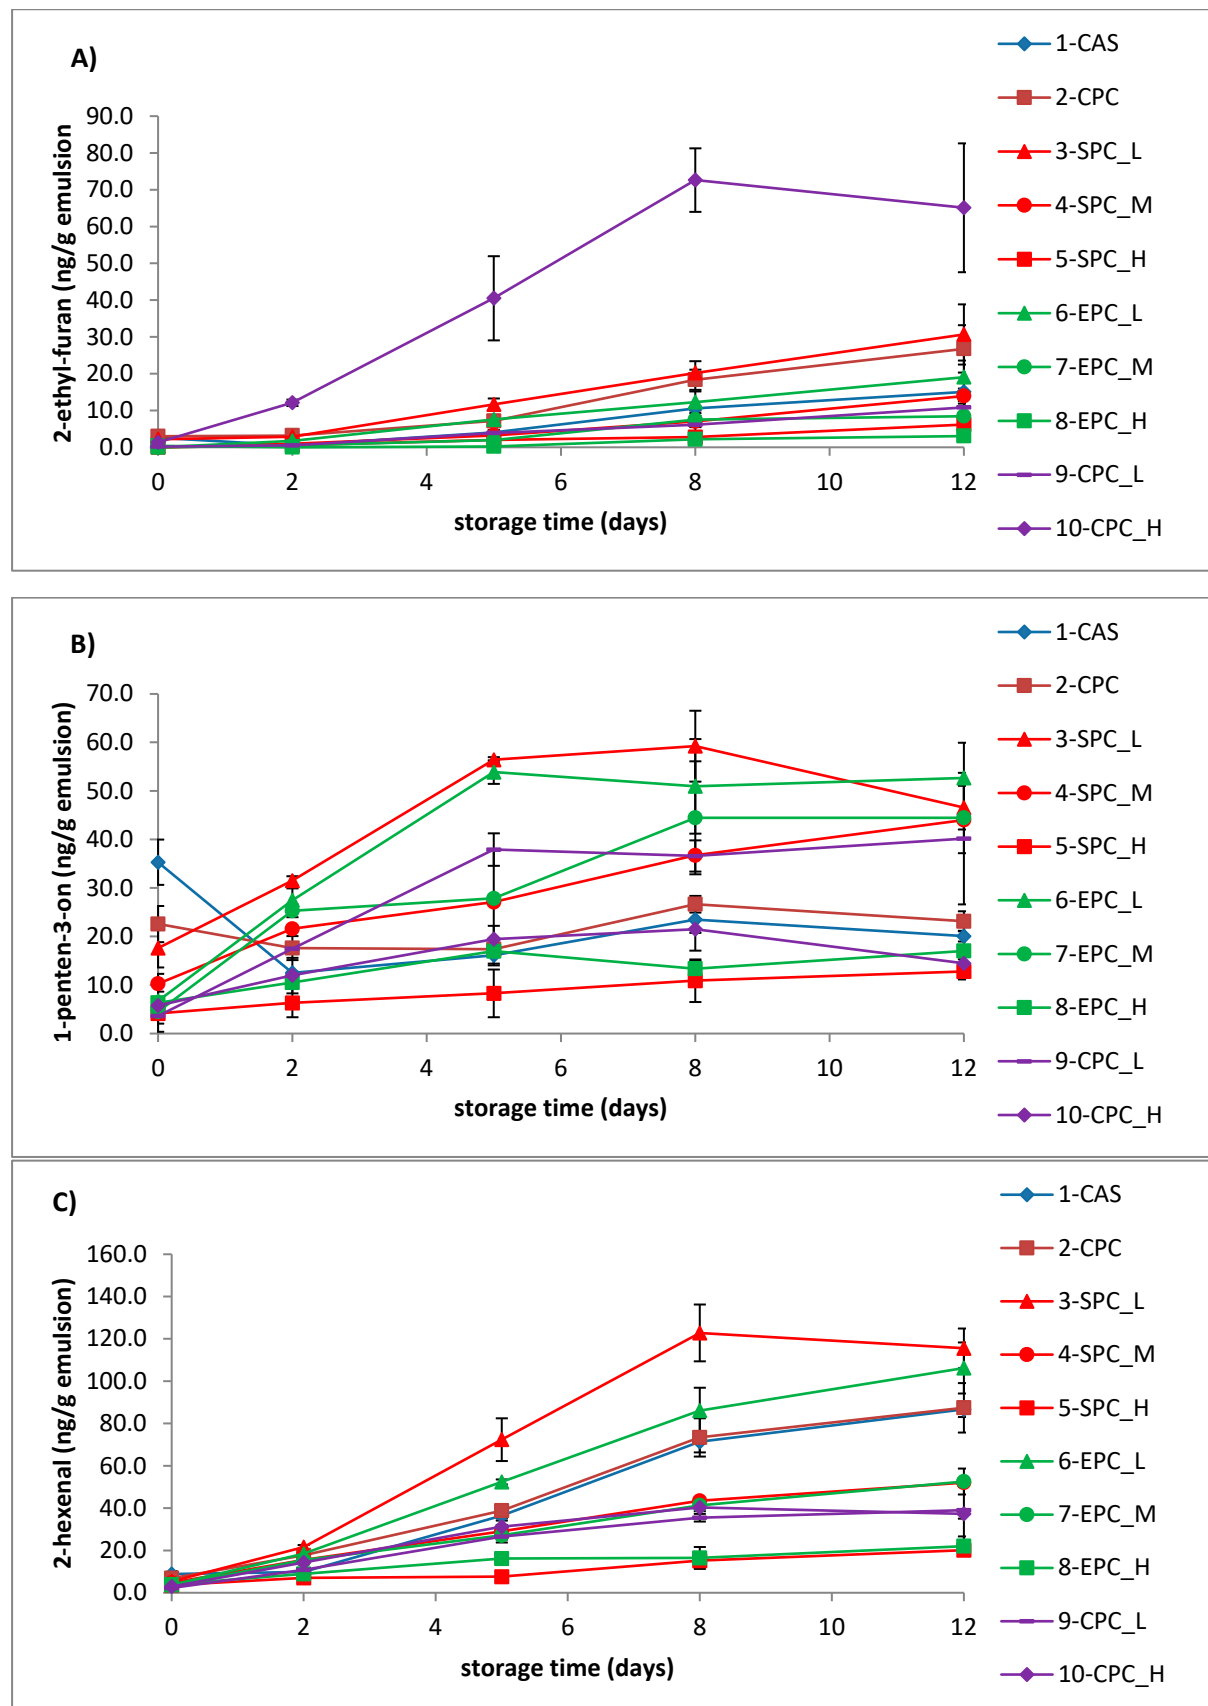

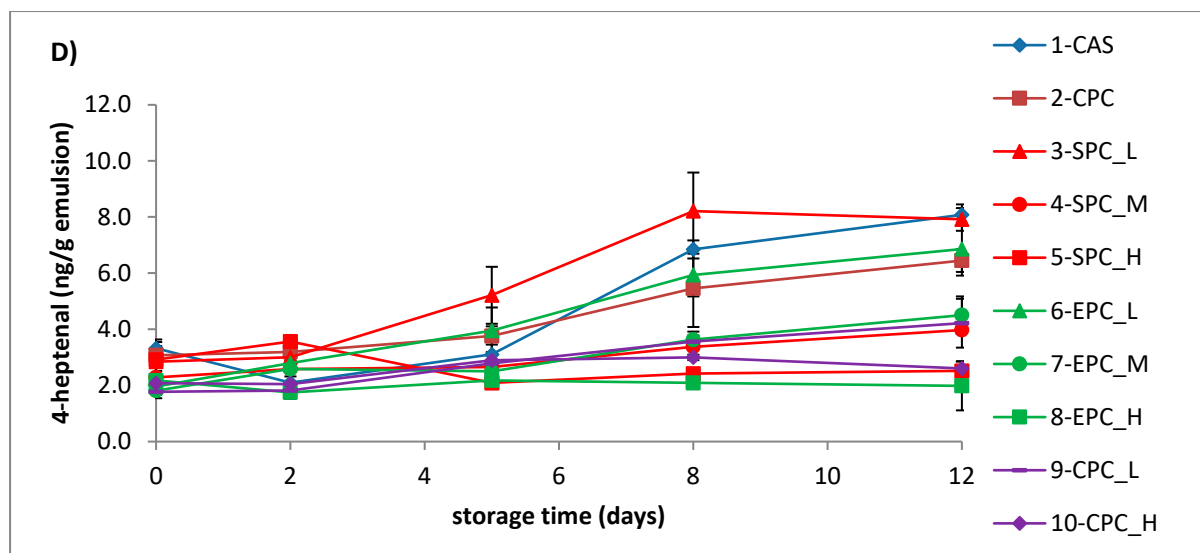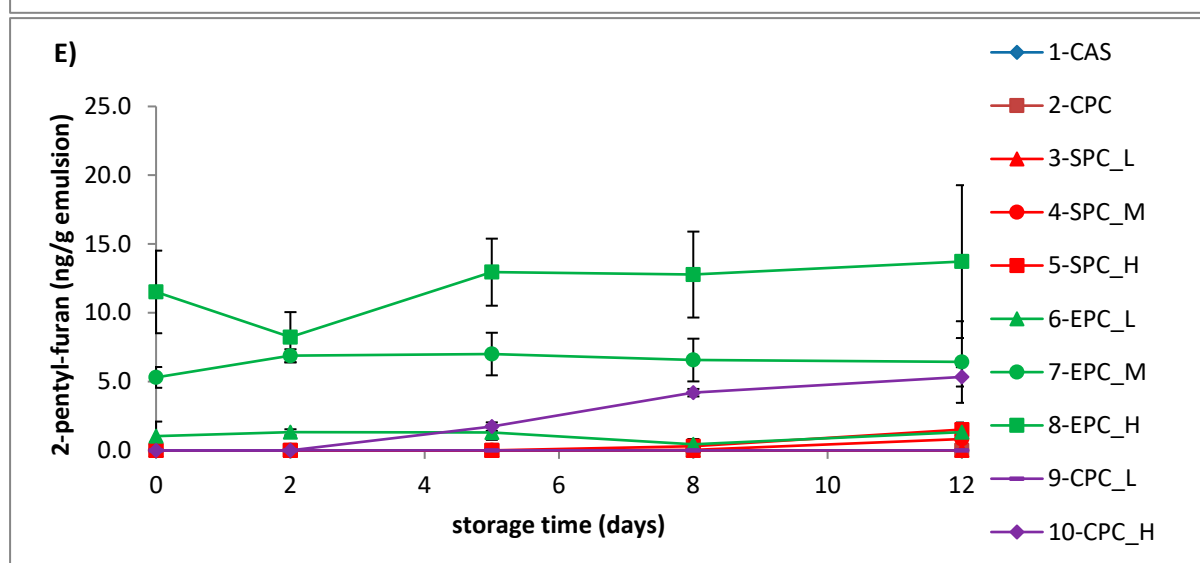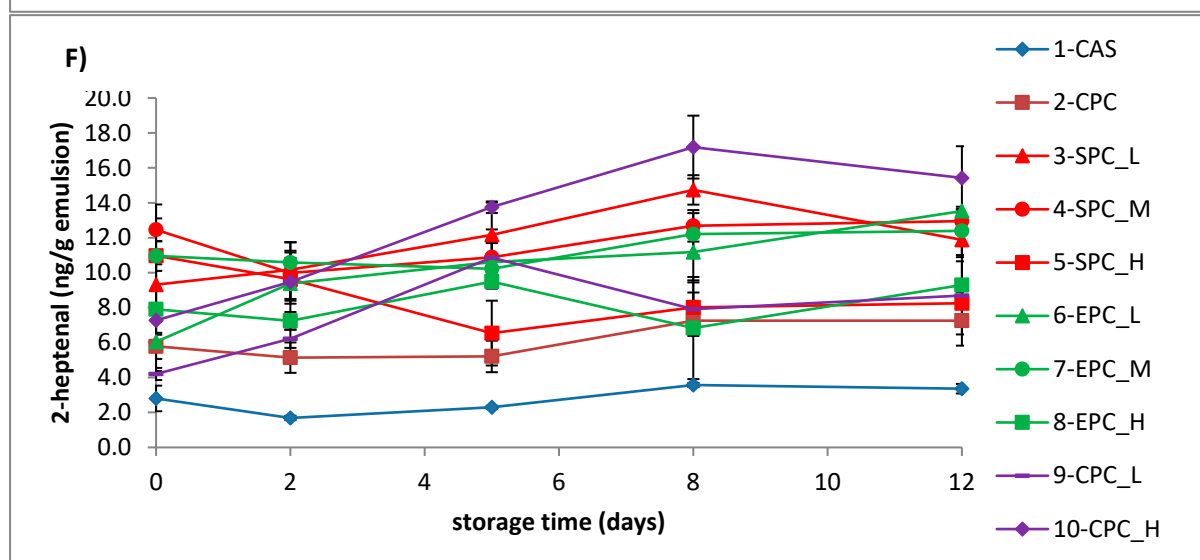

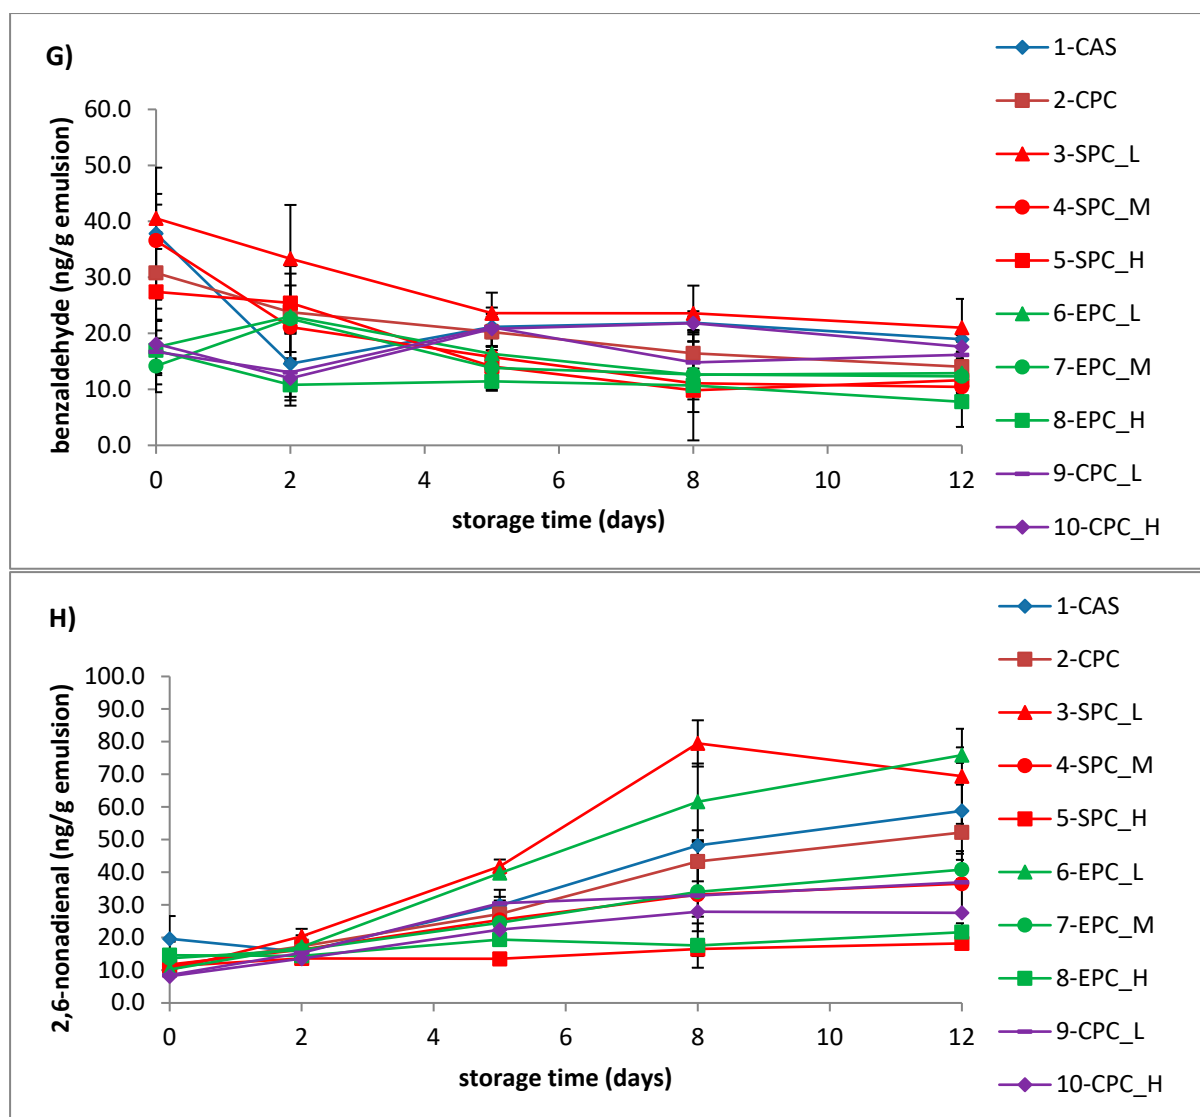

Figure S2. Development of the rest of the volatile compounds **A)** 2-ethyl-furan, **(B)** 1-penten-3-on, **(C)** 2-hexenal, **(D)** 4-heptenal, **(E)** 2-pentyl-furan, **(F)** 2-heptenal, **(G)** benzaldehyde, and **(H)** 2,6-nonadienal during 12-day storage
